# Supplementary material for: Dual-layered Mantle Lithosphere Beneath Southeastern Canadian Cordillera
Source: Research Square preprint supplement (doi:10.21203/rs.3.rs-5478095/v1), 2024-11-25
Supplement: Supplementary file 1 [file 630cf9b301618f0e3d3b2475.xlsx]

## Sheet: Sheet1
Network	Station	Lon	Lat	freq	Gauss	#SRF	LLAB		CLAB
		(deg)	(deg)	(Hz)			(km)	(km)	(km)	(km)
CNSN	EDM	-113.35	53.22	0.2	2.5	36	212	5	-	-
CNSN	NAB1	-121.26	56.77	0.1	3	54	229	9	-	-
CNSN	NAB2	-119.17	58.6	0.1	3	31	206	8	-	-
CNSN	NAHA	-123.39	61.03	0.1	3	34	208	7	-	-
CNSN	NBC1	-123.82	59.66	0.2	3	32	212	7	-	-
CNSN	NBC2	-122.49	59.77	0.2	3	25	210	6	-	-
CNSN	NBC3	-120.67	59.64	0.1	2.5	49	212	9	-	-
CNSN	NBC4	-120.66	55.69	0.2	3	32	212	10	-	-
CNSN	NBC5	-122.68	57.52	0.1	3	42	220	10	-	-
CNSN	NBC6	-121.33	58.58	0.2	3	23	210	8	-	-
CNSN	NBC7	-120.84	56.27	0.2	2.5	36	242	22	-	-
CNSN	NBC8	-122.4	56.57	0.2	2.5	24	236	10	-	-
CNSN	PNT	-119.63	49.32	0.2	3	15	204	7	75	8
CNSN	SLEB	-118.13	51.17	0.1	3	20	214	6	116	8
CNSN	WALA	-113.91	49.06	0.1	3	51	213	6	-	-
RV	BDMTA	-118.91	54.81	0.1	3	31	191	14	83	10
RV	BELVA	-114.38	49.59	0.2	2.5	67	215	19	82	6
RV	BRGNA	-114.73	51.68	0.1	5	16	197	11	-	-
RV	BRLDA	-117.4	54.09	0.2	2.5	36	203	9	-	-
RV	DEDWA	-117.39	56.64	0.2	2.5	48	231	5	-	-
RV	EGLEA	-116.44	54.46	0.2	2.5	39	216	4	-	-
RV	FAIRA	-118.86	56.11	0.2	2.5	45	225	14	-	-
RV	FOXCA	-116.81	54.4	0.2	3	7	186	4	-	-
RV	GODA	-119.57	55.84	0.2	2.5	22	211	5	-	-
RV	HSPGA	-113.65	49.36	0.2	2.5	33	206	4	-	-
RV	HILA	-117.02	58.56	0.1	3	43	221	10	73	6
RV	KIMIA	-116.61	55.99	0.1	3	27	227	10	-	-
RV	LGPLA	-115.36	53.12	0.2	3	39	210	6	-	-
RV	MANA	-117.64	56.86	0.2	3	15	226	9	-	-
RV	MKRVA	-111.78	49.14	0.2	3	57	215	5	-	-
RV	RDEA	-115.32	56.55	0.2	2.5	29	183	9	91?	12
RV	REDDA	-113.9	52.18	0.1	5	5	212	5	-	-
RV	SNUFA	-117.54	54.68	0.2	2.5	33	190	5	-	-
RV	STPRA	-117.54	55.66	0.2	2.5	58	218	4	-	-
RV	SWHSA	-116.75	54.9	0.1	3	22	219	5	-	-
RV	TONYA	-117.49	54.41	0.2	2.5	9	200	8	-	-
RV	WTMTA	-119.24	55.69	0.2	2.5	45	193	8	-	-
RV	WAPA	-119.25	55.18	0.1	3	30	201	9	-	-
RV	YELLA	-117.14	53.24	0.2	3	11	197	7	-	-
CRANE	BR2	-117.86	53.33	0.1	3	30	211	9	-	-
CRANE	BRU	-117.87	53.32	0.1	3	34	210	10	-	-
CRANE	CL2	-110.51	54.38	0.1	3	41	199	10	-	-
CRANE	CLA	-113.53	50.01	0.2	2	43	206	7	-	-
CRANE	COK	-111.06	55.63	0.1	3	22	212	7	-	-
CRANE	CZA	-110.87	52.49	0.1	3	38	220	8	-	-
CRANE	DOR	-108.62	54.18	0.1	3	25	216	11	-	-
CRANE	FMC	-111.35	56.67	0.2	2.5	36	222	4	-	-
CRANE	FMK	-111.42	57.12	0.1	3	28	217	3	-	-
CRANE	GCA	-119.16	53.87	0.2	2	45	184	12	-	-
CRANE	HLO	-112.28	54.7	0.2	3	39	226	6	-	-
CRANE	HON	-114.05	55.08	0.2	3	48	220	6	-	-
CRANE	JOF	-113.51	52.34	0.1	3	22	216	8	-	-
CRANE	LYA	-113.47	51.16	0.1	3	62	195	10	-	-
CRANE	MCL	-117.1	55.71	0.1	3	45	225	4	-	-
CRANE	MHB	-110.16	50.34	0.1	3	33	228	10	-	-
CRANE	NOR	-116.05	52.49	0.1	3	84	201	22	-	-
CRANE	PAC	-116.84	54.23	0.1	3	26	190	7	-	-
CRANE	PER	-116.04	53.68	0.1	3	27	200	11	-	-
CRANE	RDR	-113.56	52.27	0.1	3	92	217	10	-	-
CRANE	REC	-115.28	56.55	0.1	3	18	180	10	-	-
CRANE	RW1	-113.18	53.85	0.2	2	32	226	6	-	-
CRANE	RW2	-111.75	53.35	0.1	3	31	210	7	-	-
CRANE	RW3	-113.65	54.44	0.1	3	27	220	15	-	-
CRANE	RW4	-114.55	53.8	0.1	3	29	229	9	-	-
CRANE	RW5	-111.58	54.2	0.1	3	41	207	13	-	-
CRANE	SWH	-115.36	54.73	0.2	3	22	219	6	-	-
CRANE	WBF	-111.72	56.16	0.2	2.5	27	213	6	-	-
TA	A08A	-119.27	48.95	0.2	3	32	186	10	74	4
TA	A09A	-118.59	48.98	0.2	3	23	173	10	72	7
TA	A10A	-117.56	48.98	0.2	3	25	176	4	106	6
TA	A11A	-116.36	48.96	0.2	3	42	178	6	86	11
TA	A12A	-115.65	48.93	0.2	3	62	210	8	67	6
TA	A13A	-114.41	48.93	0.2	3	48	214	4	110	6
TA	A14A	-113.42	48.97	0.2	3	16	205	5	64	8
TA	A15A	-112.73	48.98	0.2	3	30	200	4	-	-
TA	A16A	-111.6	48.95	0.2	3	23	215	6	-	-
TA	A17A	-110.7	48.94	0.2	3	23	207	7	-	-
TA	B08A	-119.33	48.36	0.2	3	41	188	6	90	9
TA	B09A	-118.15	48.42	0.2	3	51	188	6	93	12
TA	B10A	-117.23	48.3	0.2	3	28	186	6	87	7
TA	B11A	-116.37	48.44	0.2	3	29	189	6	76	7
TA	B12A	-115.59	48.47	0.2	3	32	183	6	62	5
TA	B13A	-114.47	48.37	0.2	3	44	210	9	116	9
TA	B14A	-113.27	48.36	0.2	3	10	204	6	54	6
TA	B15A	-112.56	48.31	0.2	3	30	204	4	-	-
TA	B16A	-111.71	48.41	0.1	3	37	227	10	-	-
TA	B17A	-110.8	48.29	0.2	3	31	216	5	-	-
TA	C08A	-119.05	47.78	0.2	3	32	183	5	60	6
TA	C09A	-118.27	47.8	0.2	3	120	206	5	68	8
TA	C10A	-117.31	47.82	0.2	3	44	197	8	76	7
TA	C11A	-116.26	47.84	0.2	3	24	199	7	84	13
TA	C12A	-115.48	47.7	0.1	3	31	214	16	67	11
TA	C13A	-114.57	47.68	0.2	3	51	198	9	-	-
TA	C14A	-113.75	47.77	0.2	3	42	207	4	-	-
TA	C15A	-112.61	47.78	0.2	3	23	214	5	63	9
TA	C16A	-111.75	47.8	0.2	3	25	210	4	-	-
TA	C17A	-110.76	47.63	0.2	3	16	214	7	-	-
TA	D08A	-118.92	47.06	0.2	3	47	187	10	84	8
TA	D09A	-118.31	47.06	0.2	3	74	205	4	72	15
TA	D10A	-117.28	47.05	0.2	3	48	210	6	84	14
TA	D11A	-116.34	47.05	0.1	3	32	220	10	89	13
TA	D12A	-115.35	47.05	0.2	3	37	210	6	-	-
TA	D13A	-114.46	47.09	0.2	3	24	211	5	69	8
TA	D14A	-113.51	47.08	0.1	3	59	213	11	81	10
TA	D15A	-112.52	47.04	0.2	3	24	221	5	75	6
TA	D16A	-111.55	47.03	0.2	3	16	215	7	-	-
TA	D17A	-110.69	47.15	0.1	3	18	215	12	-	-
